# Supplementary material for: Influence of Fe-clustering on the water oxidation performance of two-dimensional layered double hydroxides
Source: Royal Society of Chemistry journal article supplement (doi:10.1039/d1dt03737d), 2022-01-01
Supplement: d1dt03737d1.pdf [file d1dt03737d1.pdf]

## **Influence of Fe-clustering in the water oxidation performance of two-dimensional layered double hydroxides**

Alvaro Seijas-Da Silva,<sup>‡a</sup> Víctor Oestreicher,<sup>‡a</sup> Eugenio Coronado<sup>a</sup> and Gonzalo Abellán<sup>\*a</sup>

<sup>a</sup>Instituto de Ciencia Molecular (ICMol), Universitat de València, Catedrático José Beltrán 2, 46980, Paterna,  
Valencia, Spain.

<sup>‡</sup>Both authors contributed equally to this work.

\*gonzalo.abellan@uv.es

## Table of content

**Figure S1.** UV-Vis spectra of aqueous solutions containing  $[\text{Fe(III)}] = 5 \text{ mM}$  without and with  $[\text{TEA}] = 5 \text{ mM}$ .

**Figure S2.** High resolution Mg 1s XPS spectra in the range 1315 – 1295 eV for samples MgFe-TEA and MgFe.

**Figure S3.** High resolution Cl 2p XPS spectra in the range 210 – 190 eV for samples MgFe-TEA and MgFe.

**Table S1.** Chemical formula, structural parameters ( $d$ ), crystalline size ( $L$ ), Mg:Fe and Cl:Fe ratios for MgFe and MgFe-TEA LDHs samples.

**Figure S4.** Fitting of the  $1/\chi_M$  to a Curie–Weiss law for samples MgFe-TEA and MgFe.

**Table S2.** Magnetic parameter of MgFe-TEA and MgFe samples.

**Figure S5.** Differences in the overpotential for both samples ( $OP_{\text{MgFe}} - OP_{\text{MgFe-TEA}}$ ) as a function of the current density.

**Figure S6.** Electrochemical surface area (ECSA) of the MgFe-LDHs samples calculated from CVs performed in a non-faradaic region at different scan rates.

**Figure S7.** Electrocatalysts activation process performed as cyclic voltammetries recorded at 100 mV/s during 20 cycles: first cycle (shading cycle) and last cycle (thick line).

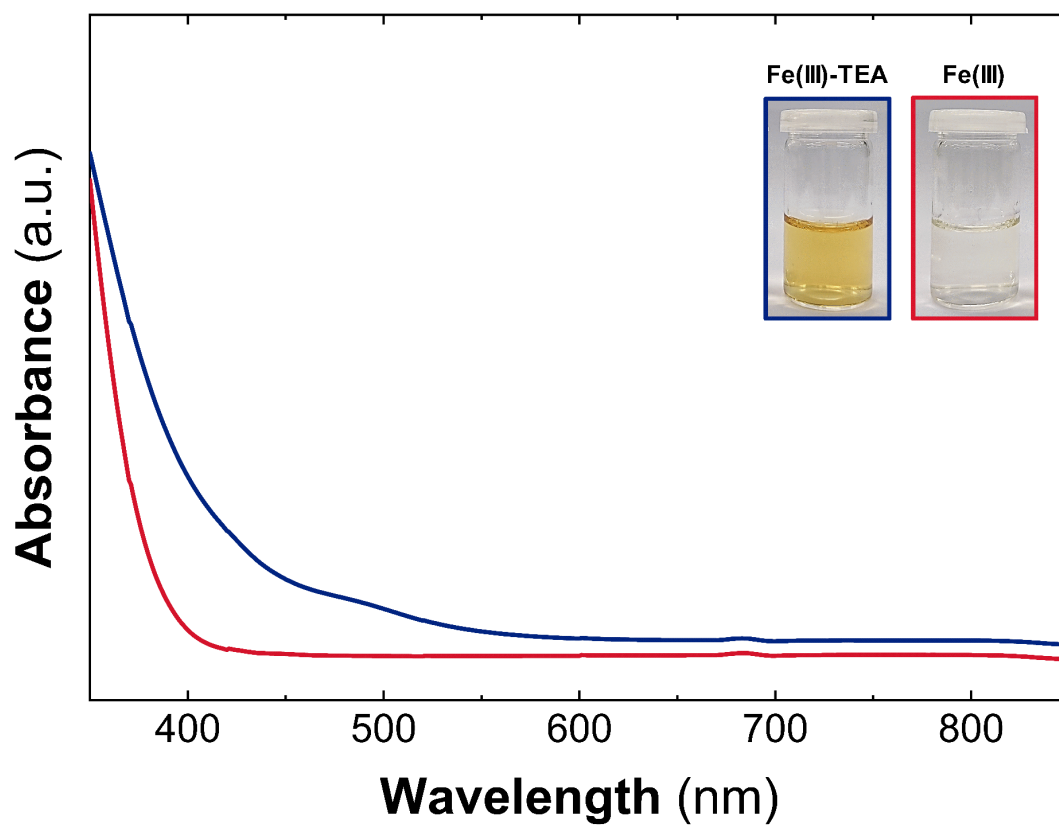

**Figure S1.** UV-Vis spectra of aqueous solutions containing  $[\text{Fe(III)}] = 5 \text{ mM}$  without (red) and with  $[\text{TEA}] = 5 \text{ mM}$  (blue).

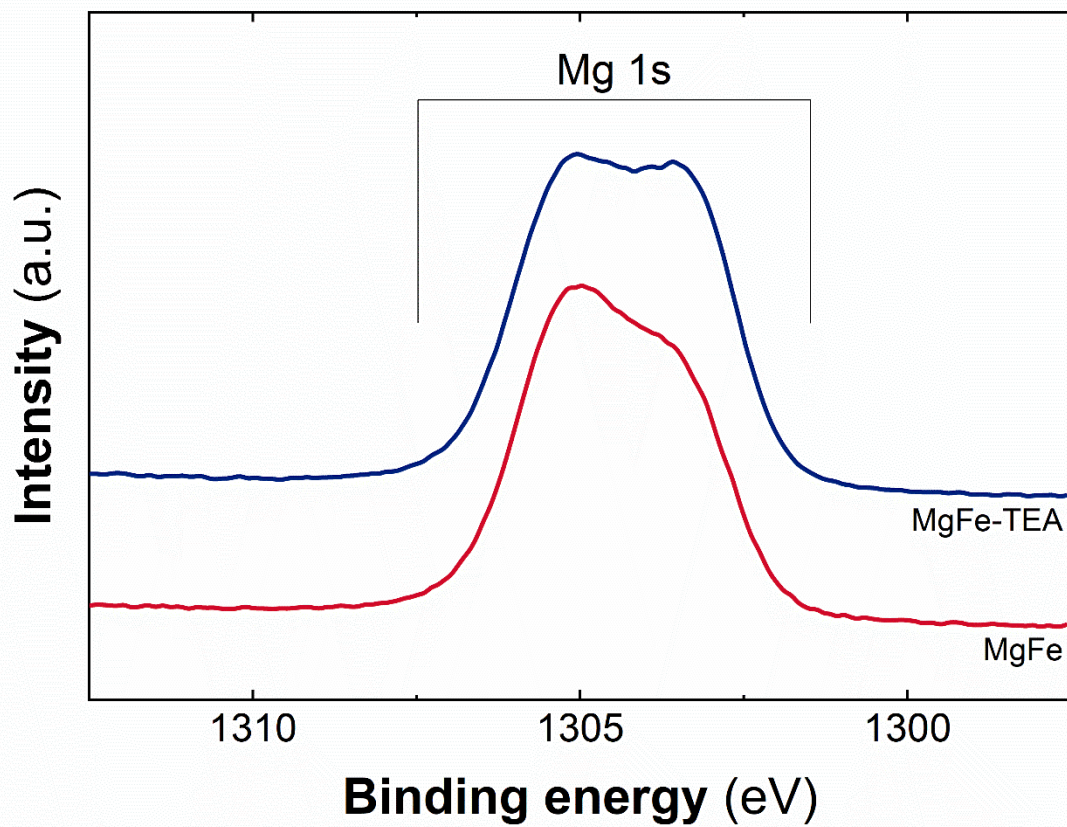

**Figure S2.** High resolution Mg 1s XPS spectra in the range 1315 – 1295 eV for samples MgFe-TEA (blue) and MgFe (red).

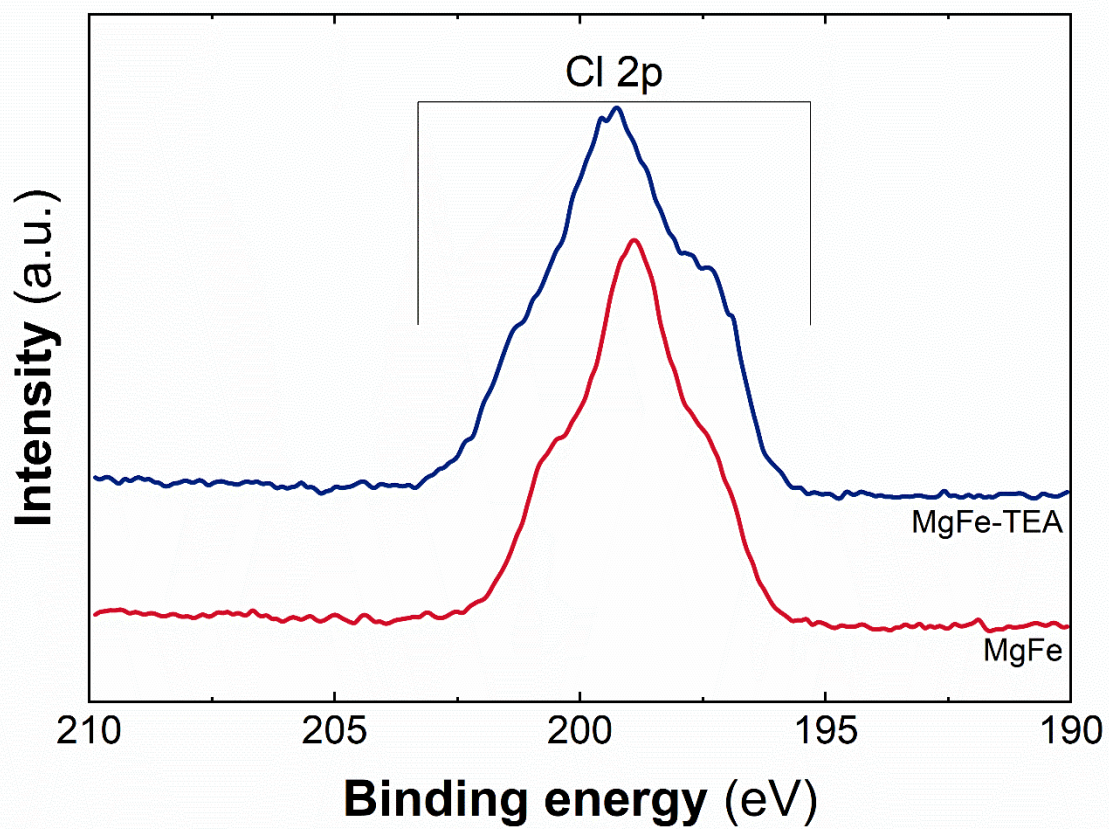

**Figure S3.** High resolution Cl 2p XPS spectra in the range 210 – 190 eV for samples MgFe-TEA (blue) and MgFe (red).

**Table S1.** Chemical formula, structural parameters (**d**), crystalline size (**L**), Mg:Fe and Cl:Fe ratios for MgFe and MgFe-TEA LDHs samples.

| Sample   | Chemical formula                                   | $d_{BS}$<br>(Å) | $L_{001}$<br>(nm) | $d_{110}$<br>(Å) | $L_{110}$<br>(nm) | Mg:Fe |     |        | Cl:Fe |     |
|----------|----------------------------------------------------|-----------------|-------------------|------------------|-------------------|-------|-----|--------|-------|-----|
|          |                                                    |                 |                   |                  |                   | XPS   | EDS | ICP-MS | XPS   | EDS |
| MgFe-TEA | $Mg_2Fe(OH)_6Cl_{0.6}(CO_3)_{0.2} \cdot 0.5(H_2O)$ | 8.06            | 26.4              | 1.56             | 26.2              | 1.8   | 2.0 | 2.1    | 0.7   | 0.6 |
| MgFe     | $Mg_2Fe(OH)_6Cl_{0.6}(CO_3)_{0.2} \cdot 0.5(H_2O)$ | 8.06            | 18.5              | 1.56             | 27.2              | 1.7   | 1.9 | 2.1    | 0.7   | 0.6 |

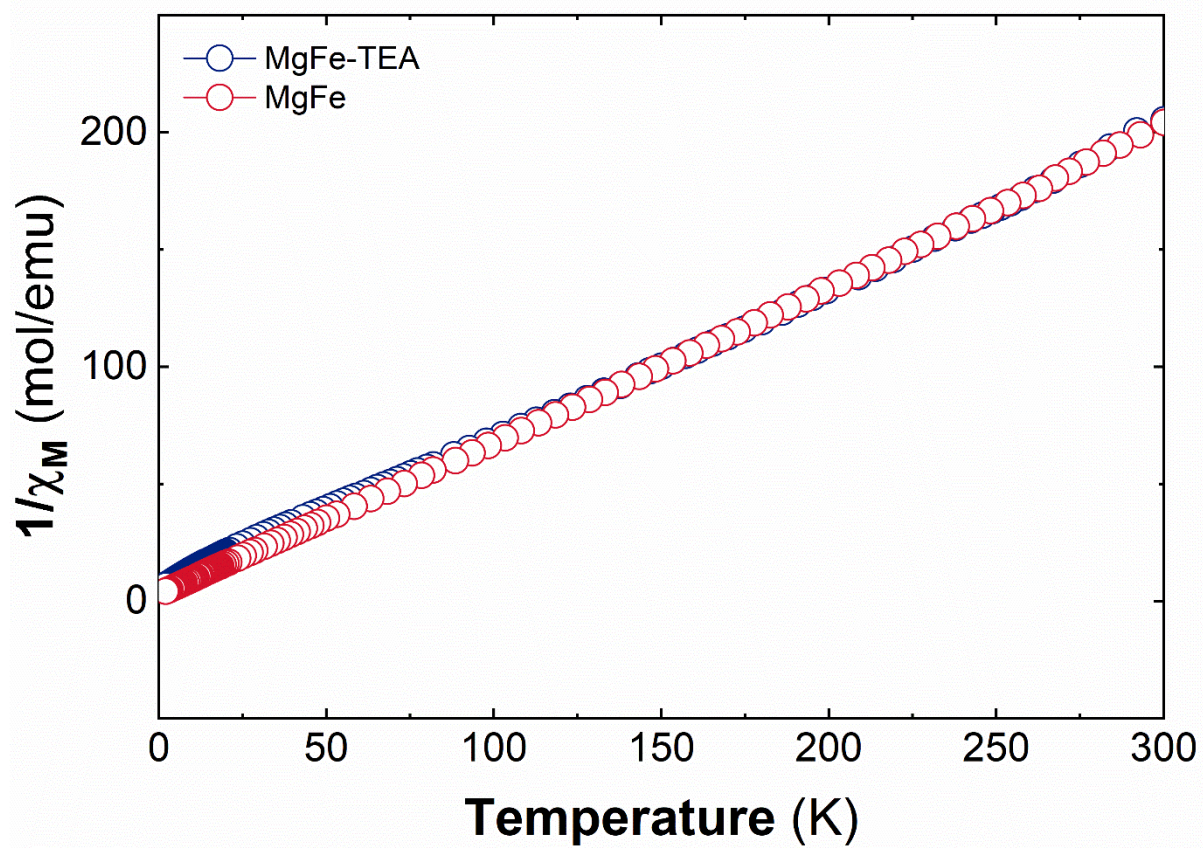

**Figure S4.** Fitting of the  $1/\chi_M$  to a Curie–Weiss law for samples MgFe-TEA (blue) and MgFe (red).

**Table S2.** Magnetic parameters of MgFe-TEA and MgFe samples.

| <b>Sample</b> | $C_{\text{spin-only}}$<br>(emu·K/mol) | $C_{\text{exp}}$<br>(emu·K/mol) | $\Theta$ (K) |
|---------------|---------------------------------------|---------------------------------|--------------|
| MgFe-TEA      | 1.44                                  | 1.44                            | -8.13        |
| MgFe          | 1.44                                  | 1.45                            | -5.49        |

$C_{\text{spin-only}}$ : expected spin-only value of the Curie constant, calculated as a diluted combination of  $\text{Mg}^{2+}$  ( $S=0$ ) and  $\text{Fe}^{3+}$  ( $S=5/2$ ).



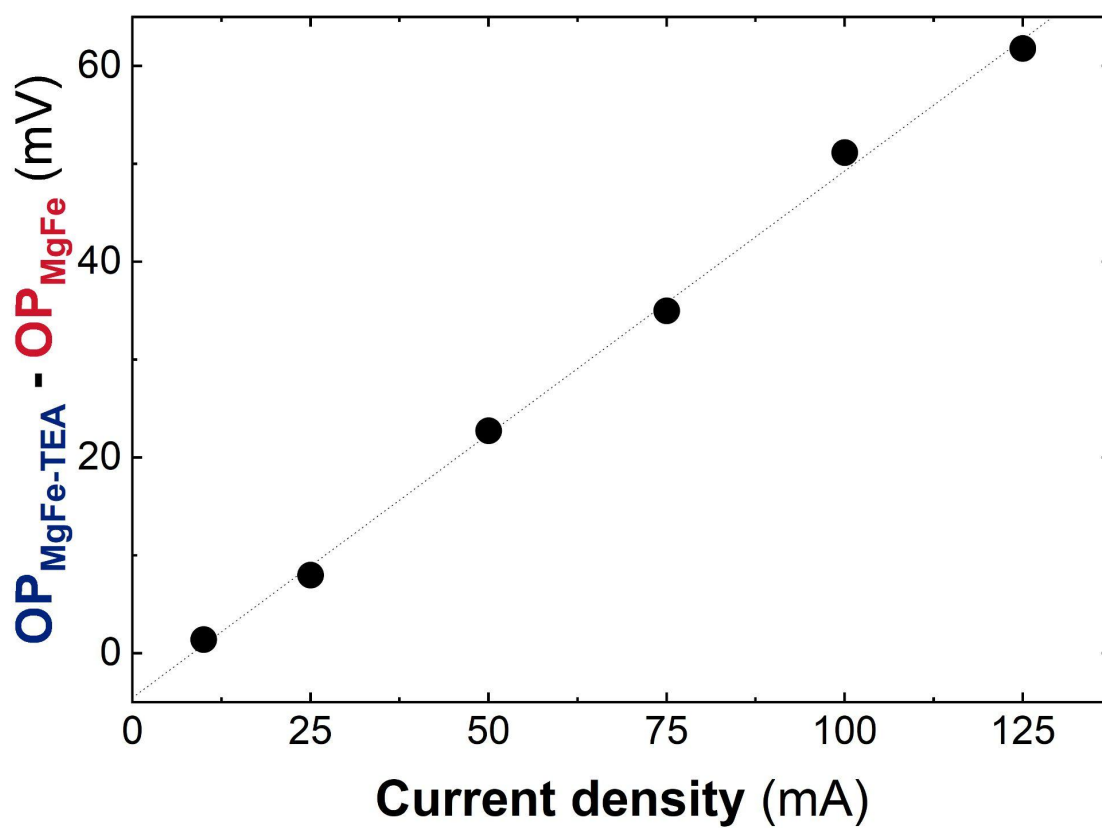

**Figure S5.** Differences in the overpotential for both samples ( $OP_{MgFe} - OP_{MgFe-TEA}$ ) as a function of the current density.

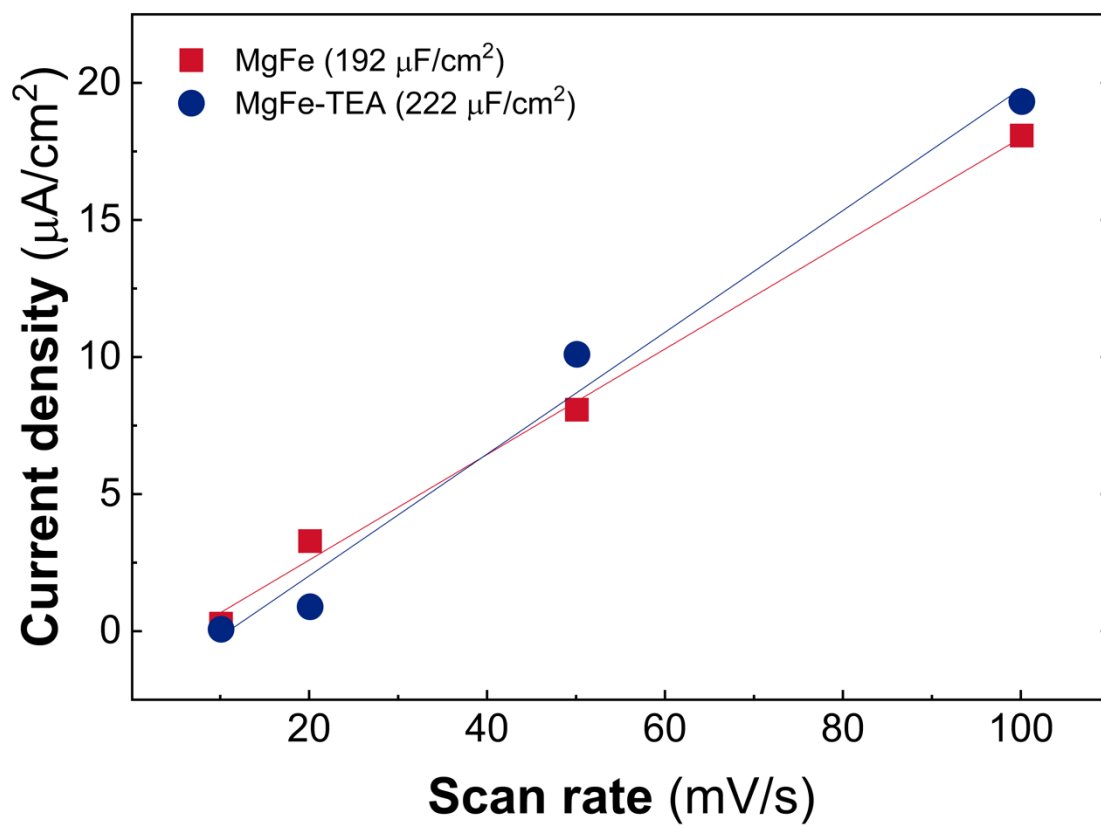

**Figure S6.** Electrochemical surface area (ECSA) of the MgFe-LDH samples calculated from CVs performed in a non-faradaic region at different scan rates.

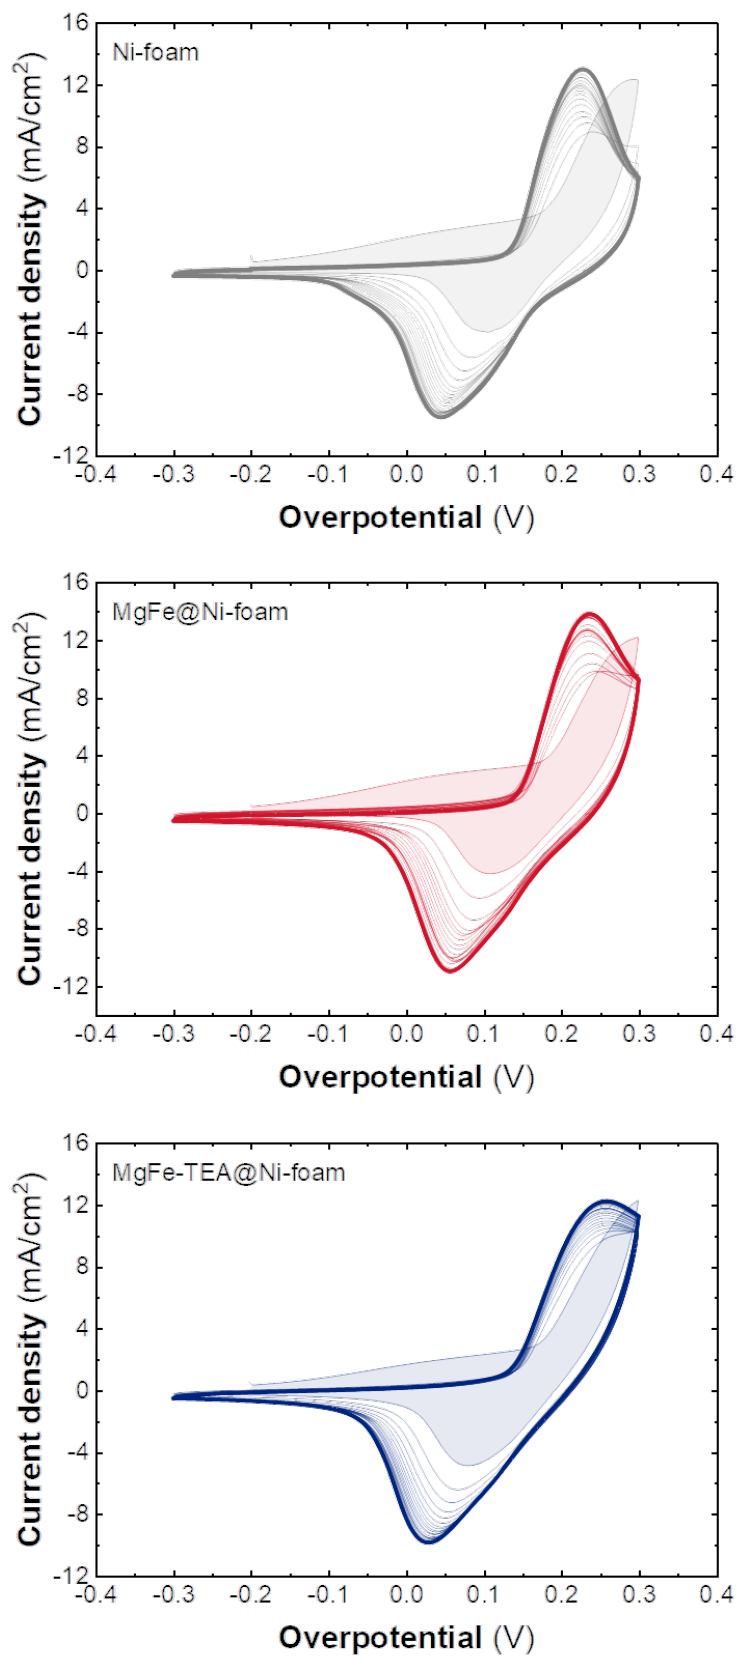

**Figure S7.** Electrocatalysts activation process performed as CVs recorded at 100 mV/s during 20 cycles: first cycle (shading cycle) and last cycle (thick line).
